# Supplementary material for: Go big or … don't? A field-based diet evaluation of freshwater piscivore and prey fish size relationships
Source: PLoS One. 2018 Mar 15;13(3):e0194092. doi: 10.1371/journal.pone.0194092 (PMC5854328; doi:10.1371/journal.pone.0194092)
Supplement: S4 Appendix — Fig A. Rock bass percentile regression evaluation. (DOCX) [file pone.0194092.s004.docx]

**S4 Appendix. Rock bass percentile regression evaluation.**

**
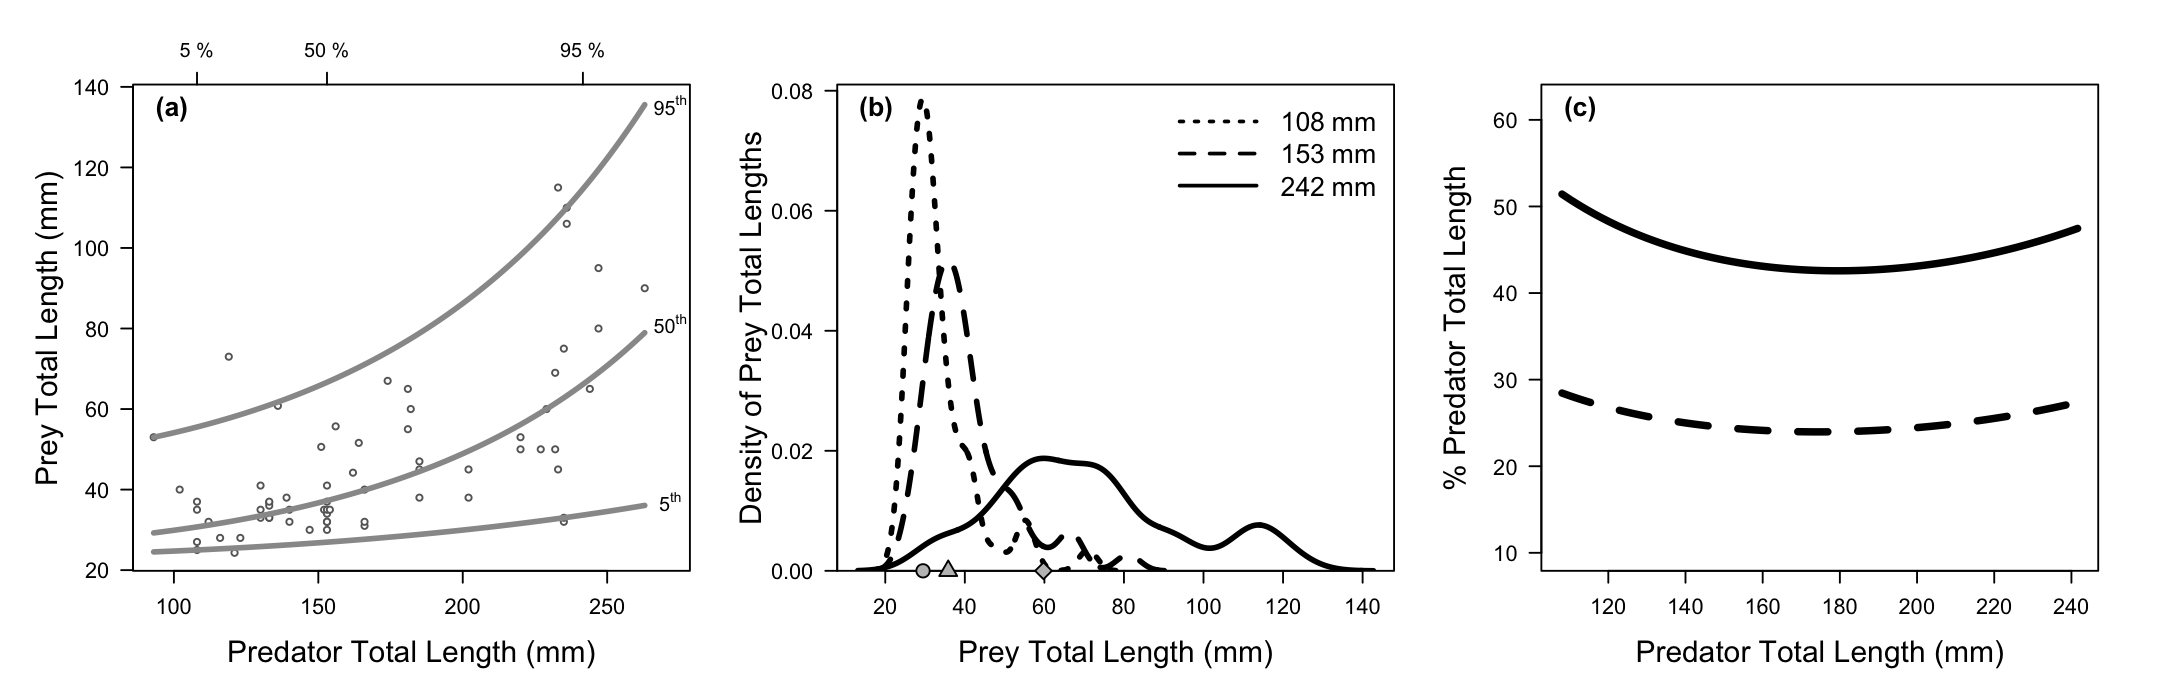
**

**Fig A. Rock bass percentile regression evaluation.** Rock bass (*Ambloplites rupestris*) (a) predator and prey fish total lengths (mm, n = 67) with 5th, 50th, and 95th percentile regressions in gray lines; (b) kernel density distributions of model predicted prey total lengths (mm) for the 5th (dotted line), 50th (dashed line), and 95th (solid line) percentile of predator total length (mm), which correspond to the top axis in (a); and (c) predator-specific maximum ingestible prey length (IPmax; 95th percentile regression; solid line) and central tendancy (IP50; 50th percentile regression; dashed line) across predator total length (mm) shown as a percentage of predator total length. The 95th is shown instead of the 99th as in Fig 2 due to low sample size.
